# Supplementary material for: Agricultural Drought Detection with MODIS Based Vegetation Health Indices in Southeast Germany
Source: MDPI journal article supplement (doi:10.3390/rs13193907), 2021-09-30
Supplement: s1 [file s1]

# Agricultural Drought Detection with MODIS Based Vegetation Health Indices in Southeast Germany

Simon Kloos <sup>1,\*</sup>, Ye Yuan <sup>1</sup>, Mariapina Castelli <sup>2</sup> and Annette Menzel <sup>1,3,\*</sup>

<sup>1</sup> TUM School of Life Sciences, Ecoclimatology, Technical University of Munich; Freising, 85354, Germany; simon.kloos@tum.de; yuan@wzw.tum.de

<sup>2</sup> Institute for Earth Observation, Eurac Research; Bolzano/Bozen, 39100, Italy; mariapina.castelli@eurac.edu

<sup>3</sup> Institute for Advanced Study, Technical University of Munich; Garching, 85748, Germany; annette.menzel@tum.de

\* Correspondence: simon.kloos@tum.de

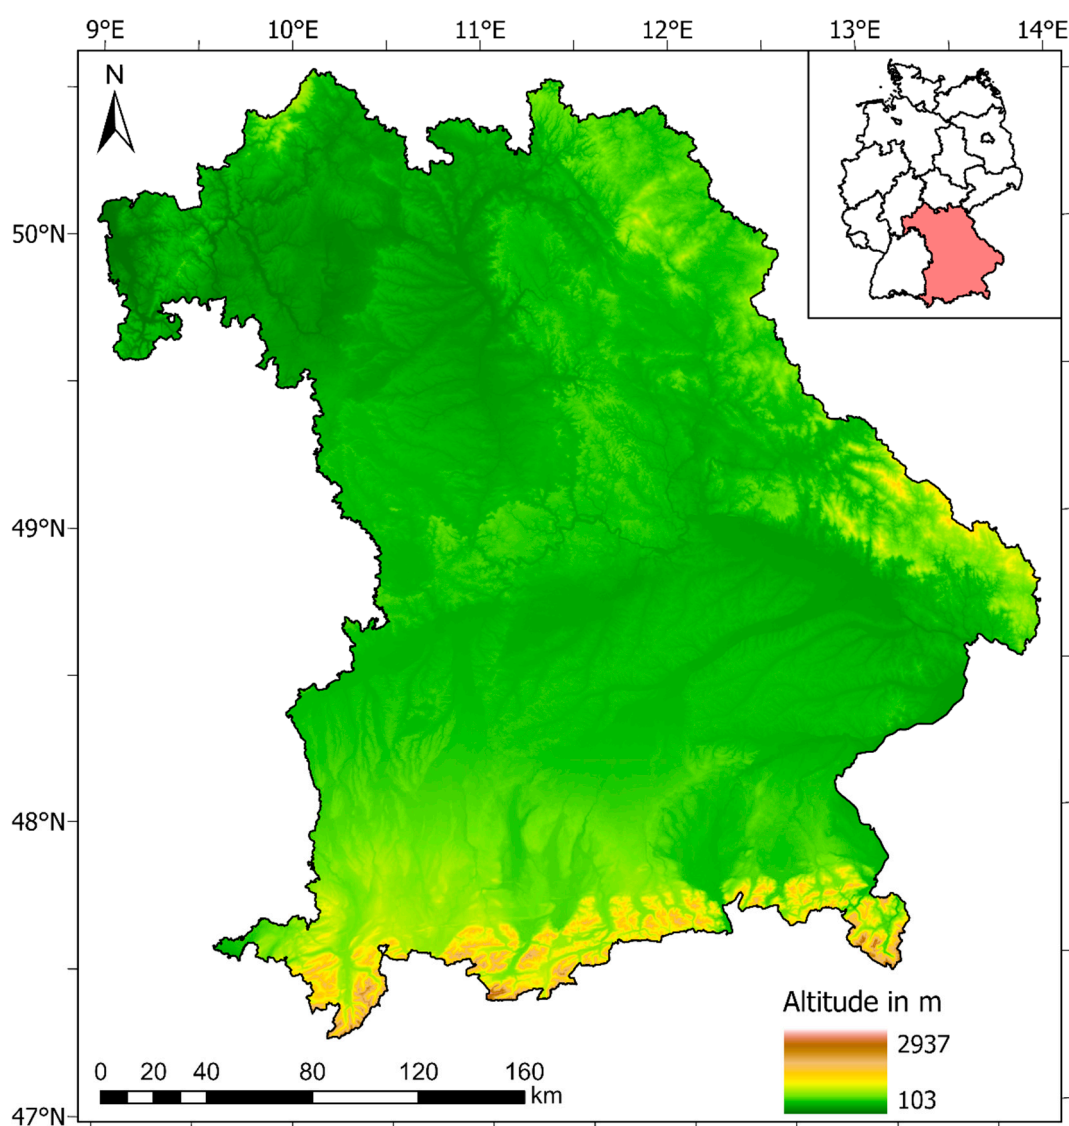

**Figure S1.** Map of altitude distribution in Bavaria. High-altitude areas are located mainly on the edge of the Alps in the south of the area and the eastern border region. The lowest-lying part of Bavaria is in the northwest (Data: EU-DEM v1.1).

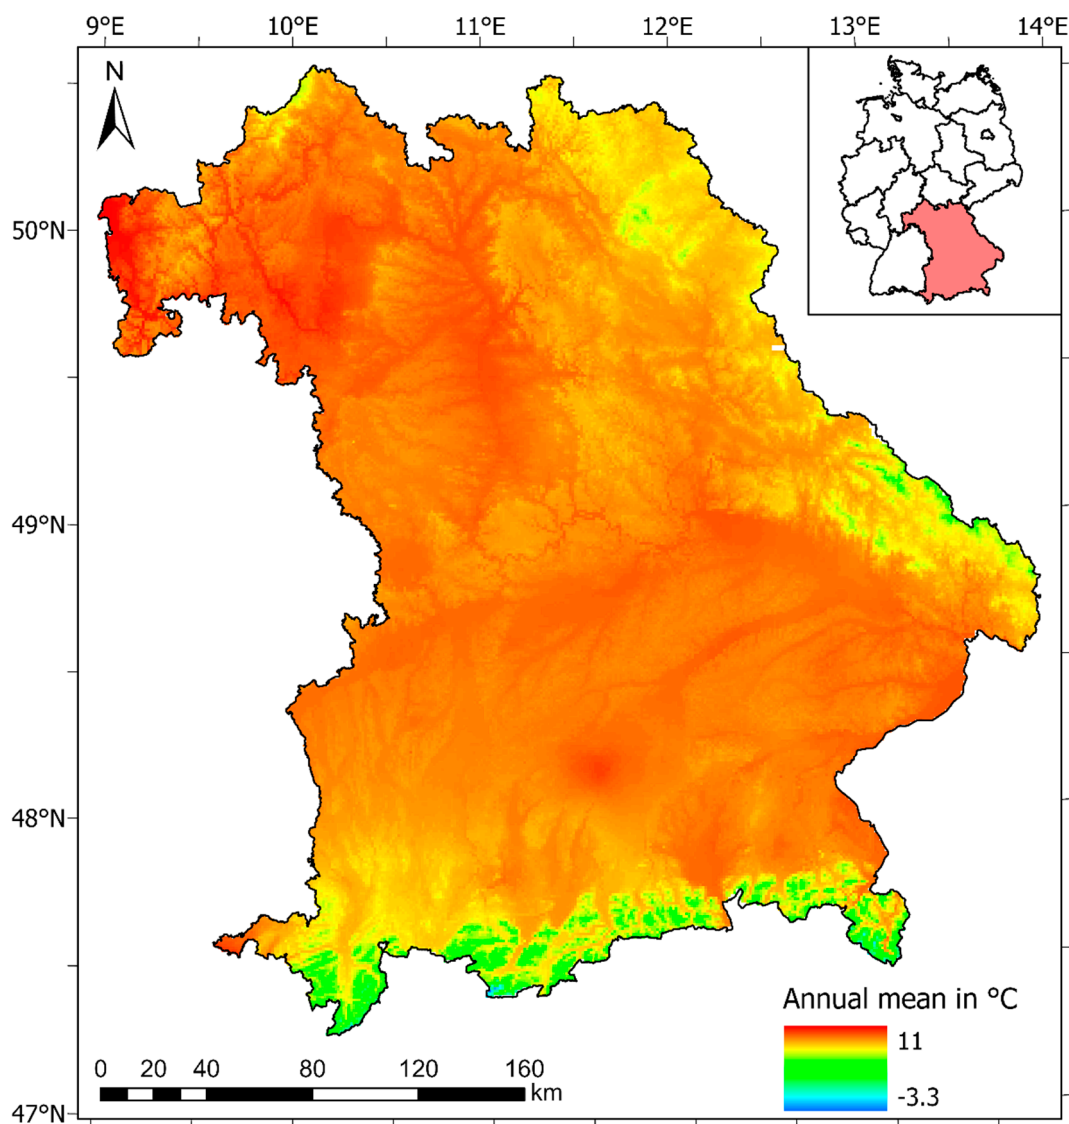

**Figure S2.** Overview map of mean annual air temperature (2 m) for Bavaria from 1991-2020. Here, the dependence of temperature on altitude (Figure S1) becomes clear: The lowest annual temperatures are found in the Alpine region and eastern Bavaria, while the highest temperatures occur in northwestern Bavaria (Data: German Meteorological Service).

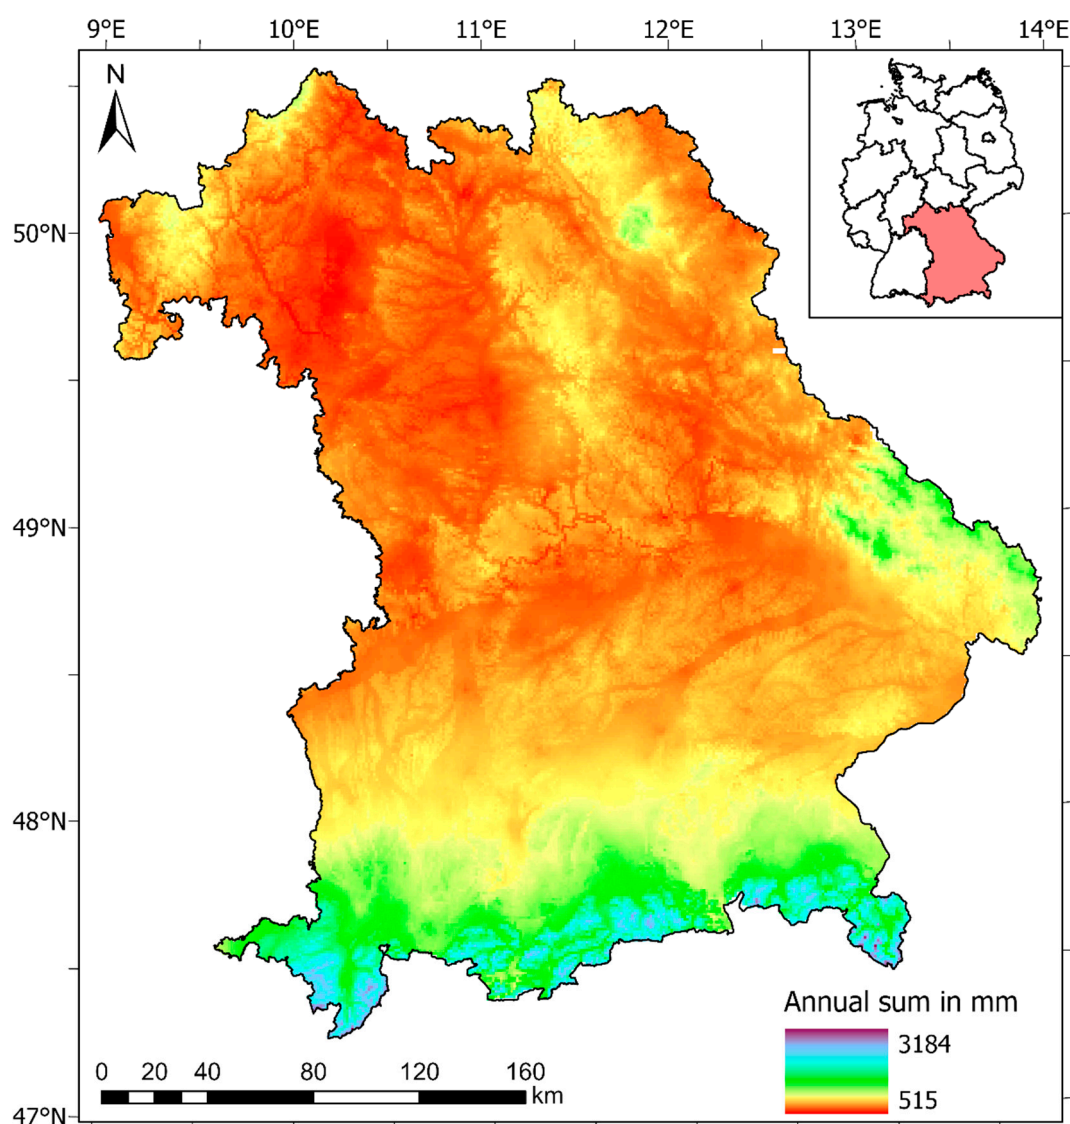

**Figure S3.** Overview map of mean annual precipitation sum in Bavaria from 1991-2020. Here, too, the dependence of annual precipitation on altitude (Figure S1) is obvious: Significantly more precipitation falls in the south and east of Bavaria, than in the rest of the study area (Data: German Meteorological Service).

**Table S1.** Simplified land cover classification according to CLC 2018 classification applied in Figure 2.

| Simplified land cover classes | Land cover classes: CLC 2018               |
|-------------------------------|--------------------------------------------|
| Urban Areas                   | Continuous urban fabric                    |
|                               | Discontinuous urban fabric                 |
|                               | Industrial or commercial units             |
|                               | Road and rail networks and associated land |
|                               | Port areas                                 |
|                               | Airports                                   |
|                               | Mineral extraction sites                   |
|                               | Dump-sites                                 |
|                               | Construction sites                         |
|                               |                                            |

|                         |                                                                                       |
|-------------------------|---------------------------------------------------------------------------------------|
|                         | Green urban areas                                                                     |
|                         | Sport and leisure facilities                                                          |
| <b>Agriculture</b>      | Non-irrigated arable land                                                             |
|                         | Permanently irrigated land                                                            |
|                         | Rice fields                                                                           |
|                         | Vineyards                                                                             |
|                         | Fruit trees and berry plantations                                                     |
|                         | Olive groves                                                                          |
|                         | Pastures                                                                              |
|                         | Annual crops associated with permanent crops                                          |
|                         | Complex cultivation patterns                                                          |
|                         | Land principally occupied by agriculture with significant areas of natural vegetation |
|                         | Agro-forestry areas                                                                   |
| <b>Forest</b>           | Broad-leaved forest                                                                   |
|                         | Coniferous forest                                                                     |
|                         | Mixed forest                                                                          |
| <b>Grassland</b>        | Natural grasslands                                                                    |
|                         | Moors and heathland                                                                   |
|                         | Sclerophyllous vegetation                                                             |
|                         | Transitional woodland-shrub                                                           |
| <b>Bare</b>             | Beaches dunes sands                                                                   |
|                         | Bare rocks                                                                            |
|                         | Sparsely vegetated areas                                                              |
|                         | Burnt areas                                                                           |
| <b>Snow and Glacier</b> | Glaciers and perpetual snow                                                           |
| <b>Wetlands</b>         | Inland marshes                                                                        |
|                         | Peat bogs                                                                             |
|                         | Salt marshes                                                                          |
|                         | Salines                                                                               |
|                         | Intertidal flats                                                                      |
| <b>Water Bodies</b>     | Water-courses                                                                         |
|                         | Water bodies                                                                          |
|                         | Coastal lagoons                                                                       |
|                         | Estuaries                                                                             |
|                         | Sea and ocean                                                                         |

**Table S2.** Classification of the MCD12Q1 International Geosphere-Biosphere Programme (IGBP) classes into the vegetation mask and the non-vegetation mask.

| Mask              | Name                         | Description                                                                        |
|-------------------|------------------------------|------------------------------------------------------------------------------------|
| <b>Vegetation</b> | Evergreen Needleleaf Forests | Dominated by evergreen conifer trees (canopy >2 m). Tree cover >60%.               |
|                   | Evergreen Broadleaf Forests  | Dominated by evergreen broadleaf and palmate trees (canopy >2 m). Tree cover >60%. |



|                       |                                     |                                                                                                         |
|-----------------------|-------------------------------------|---------------------------------------------------------------------------------------------------------|
|                       | Deciduous Needleleaf Forests        | Dominated by deciduous needleleaf (larch) trees (canopy >2 m). Tree cover >60%.                         |
|                       | Deciduous Broadleaf Forests         | Dominated by deciduous broadleaf trees (canopy >2 m). Tree cover >60%.                                  |
|                       | Mixed Forests                       | Dominated by neither deciduous nor evergreen (40-60% of each) tree type (canopy >2 m). Tree cover >60%. |
|                       | Closed Shrublands                   | Dominated by woody perennials (1-2 m height) >60% cover.                                                |
|                       | Open Shrublands                     | Dominated by woody perennials (1-2 m height) 10-60% cover.                                              |
|                       | Woody Savannas                      | Tree cover 30-60% (canopy >2 m).                                                                        |
|                       | Savannas                            | Tree cover 10-30% (canopy >2 m).                                                                        |
|                       | Grasslands                          | Dominated by herbaceous annuals (<2 m).                                                                 |
|                       | Croplands                           | At least 60% of area is cultivated cropland.                                                            |
|                       | Cropland/Natural Vegetation Mosaics | Mosaics of small-scale cultivation 40-60% with natural tree, shrub, or herbaceous vegetation.           |
| <b>Non-Vegetation</b> | Permanent Wetlands                  | Permanently inundated lands with 30-60% water cover and >10% vegetated cover.                           |
|                       | Urban and Built-up Lands            | At least 30% impervious surface area including building materials, asphalt, and vehicles.               |
|                       | Permanent Snow and Ice              | At least 60% of area is covered by snow and ice for at least 10 months of the year.                     |
|                       | Barren                              | At least 60% of area is non-vegetated barren (sand, rock, soil) areas with less than 10% vegetation.    |
|                       | Water Bodies                        | At least 60% of area is covered by permanent water bodies.                                              |

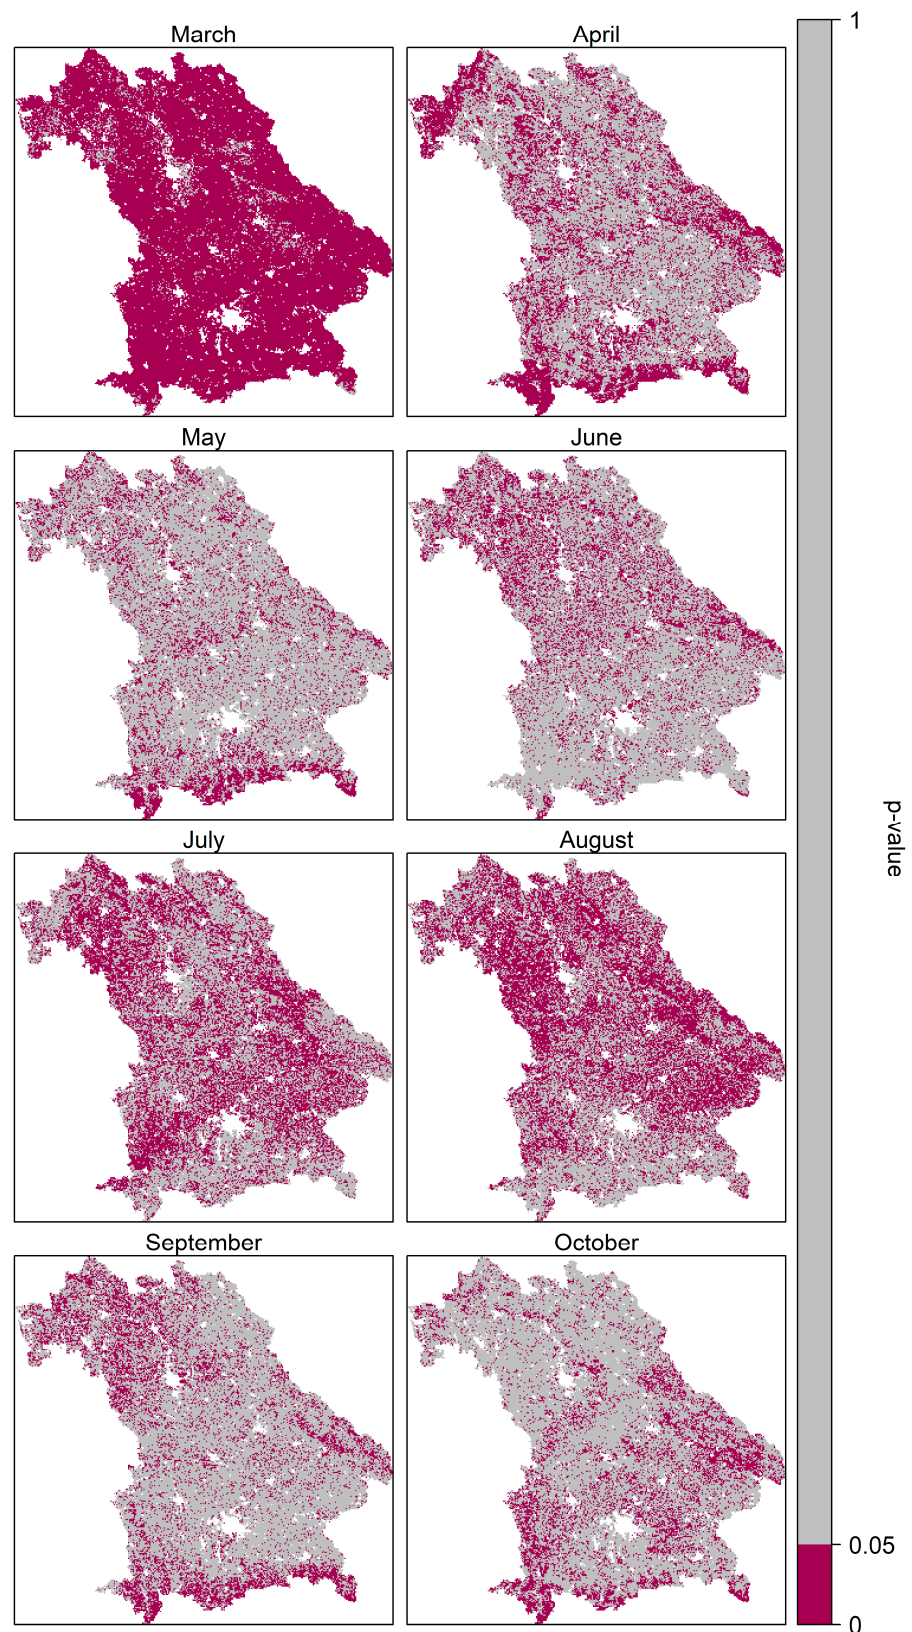

**Figure S4.** P-values of the pixel-based monthly correlation coefficients (Bravais-Pearson) between NDVI and LST in Bavaria from 2001 to 2020 during the vegetation period (March to October; Figure 3). The purple-colored pixels represent all areas in the respective month which have a p-value < 0.05 and thus a statistically significant correlation.

**Table S3.** Pixel-based monthly correlation coefficients (Bravais-Pearson) between NDVI and LST in Bavaria from 2001 to 2020 during the vegetation period (March to October; Figure 3). The gray tone of the cell increases with the percentage amount (maximum: 100%). The range between  $>-0.1$  and  $0.1$  (no correlation) is marked separately.

| r            | March  | April  | May    | June   | July   | August | September | October |
|--------------|--------|--------|--------|--------|--------|--------|-----------|---------|
| -1.0 to -0.7 | 0.00%  | 0.00%  | 0.00%  | 0.00%  | 0.01%  | 0.03%  | 0.00%     | 0.00%   |
| >-0.7 to 0.5 | 0.00%  | 0.00%  | 0.01%  | 0.14%  | 2.46%  | 5.80%  | 0.04%     | 0.00%   |
| >0.5 to -0.3 | 0.02%  | 0.49%  | 1.44%  | 6.13%  | 23.14% | 24.19% | 3.43%     | 0.24%   |
| >0.3 to -0.1 | 0.13%  | 7.51%  | 16.70% | 28.04% | 36.65% | 28.80% | 20.58%    | 5.70%   |
| >-0.1 to 0.1 | 1.36%  | 26.99% | 39.63% | 38.23% | 25.94% | 23.34% | 36.72%    | 31.14%  |
| >0.1 to 0.3  | 10.24% | 35.76% | 33.20% | 21.22% | 10.62% | 14.90% | 31.45%    | 45.93%  |
| >0.3 to 0.5  | 40.67% | 23.14% | 8.20%  | 5.86%  | 1.17%  | 2.80%  | 7.49%     | 15.81%  |
| >0.5 to 0.7  | 41.85% | 5.47%  | 0.69%  | 0.37%  | 0.02%  | 0.13%  | 0.29%     | 1.14%   |
| >0.7 to 1.0  | 5.73%  | 0.63%  | 0.12%  | 0.01%  | 0.00%  | 0.00%  | 0.01%     | 0.02%   |

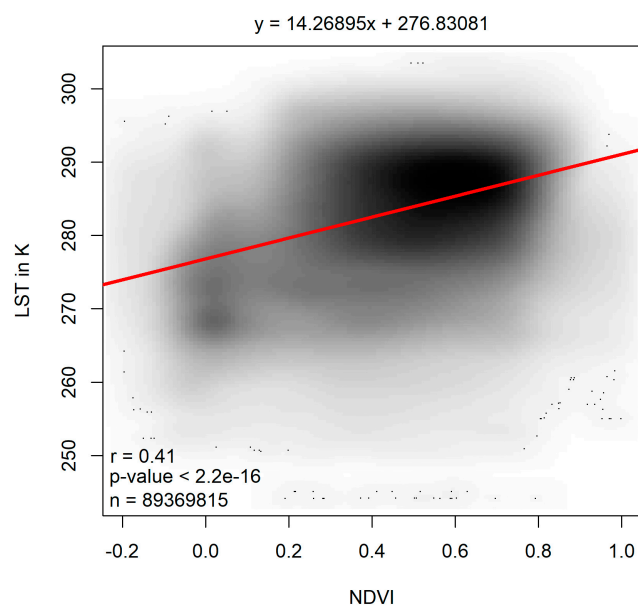

(a)

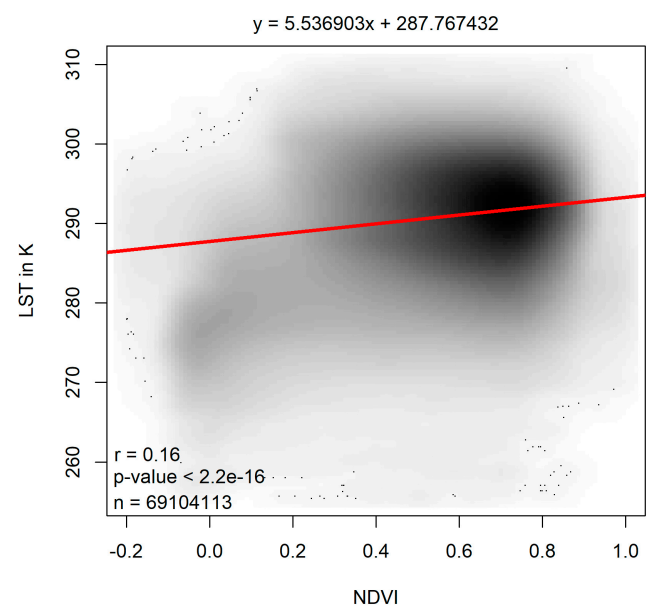

(b)

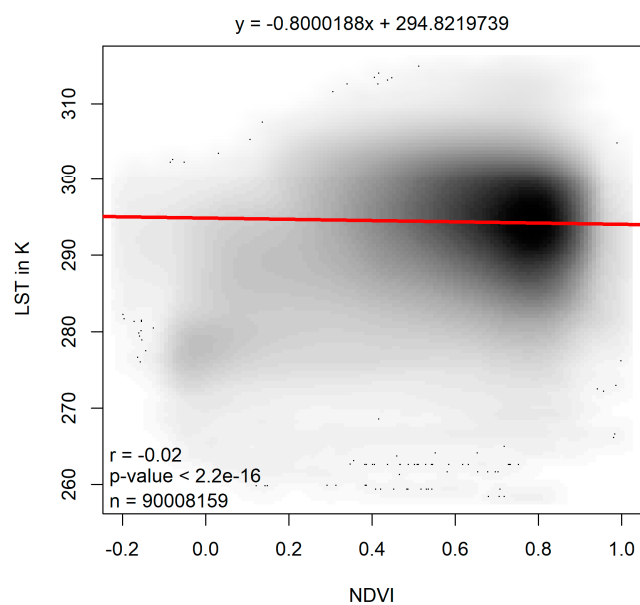

(c)

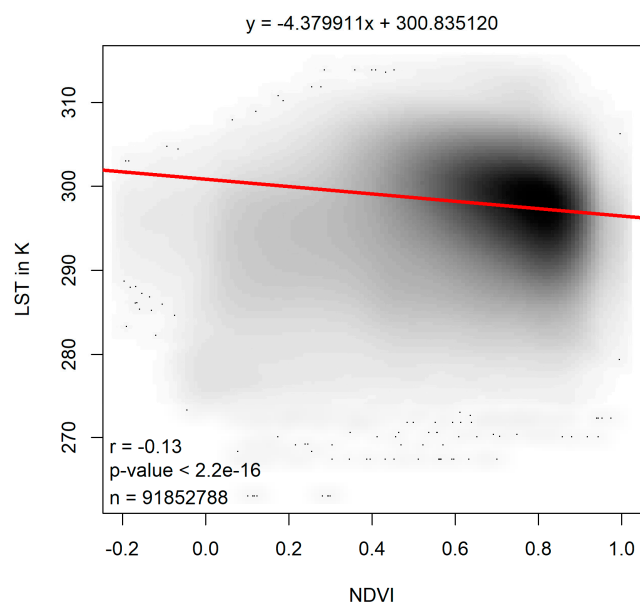

(d)

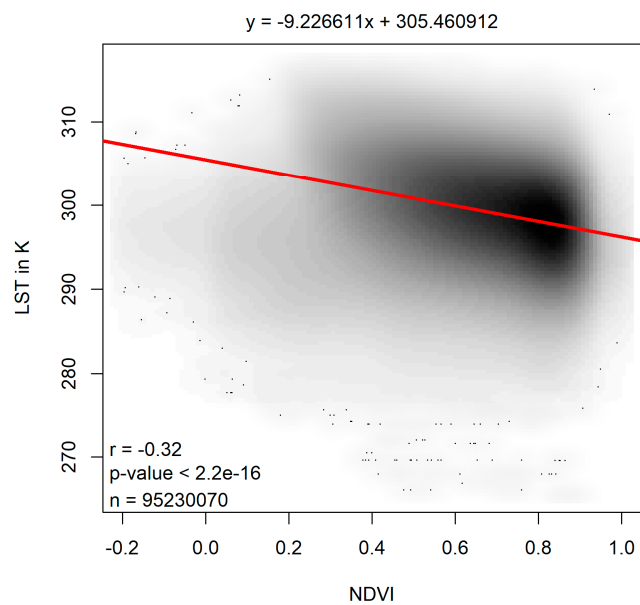

(e)

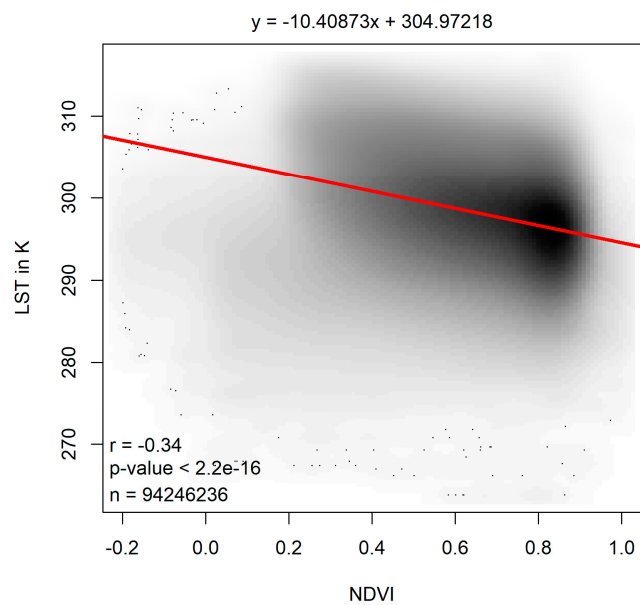

(f)

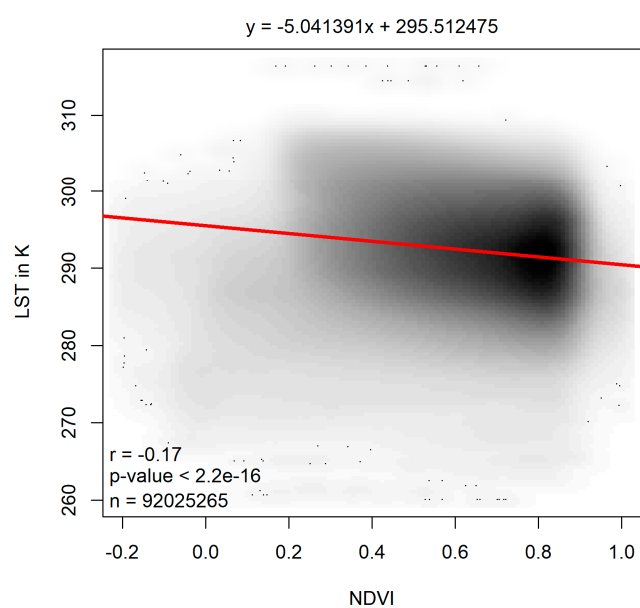

(g)

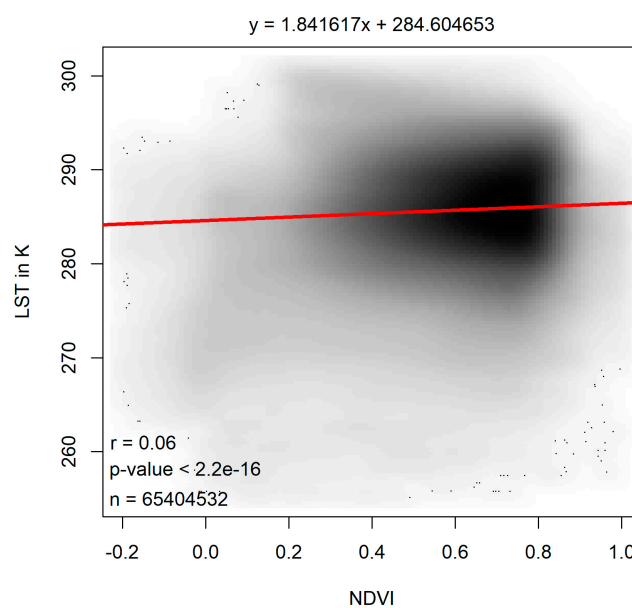

(h)

**Figure S5.** Pixel-based scatterplot between 8-day NDVI and LST in Bavaria from 2001 to 2020 in March (a), April (b), May (c), June (d), July (e), August (f), September (g), October (h; Figure 3). The red line represents the regression line associated to the regression equation (above the plot).  $r$  represents the correlation coefficient (according to Bravais-Pearson), the corresponding p-value and the number of value pairs are given.

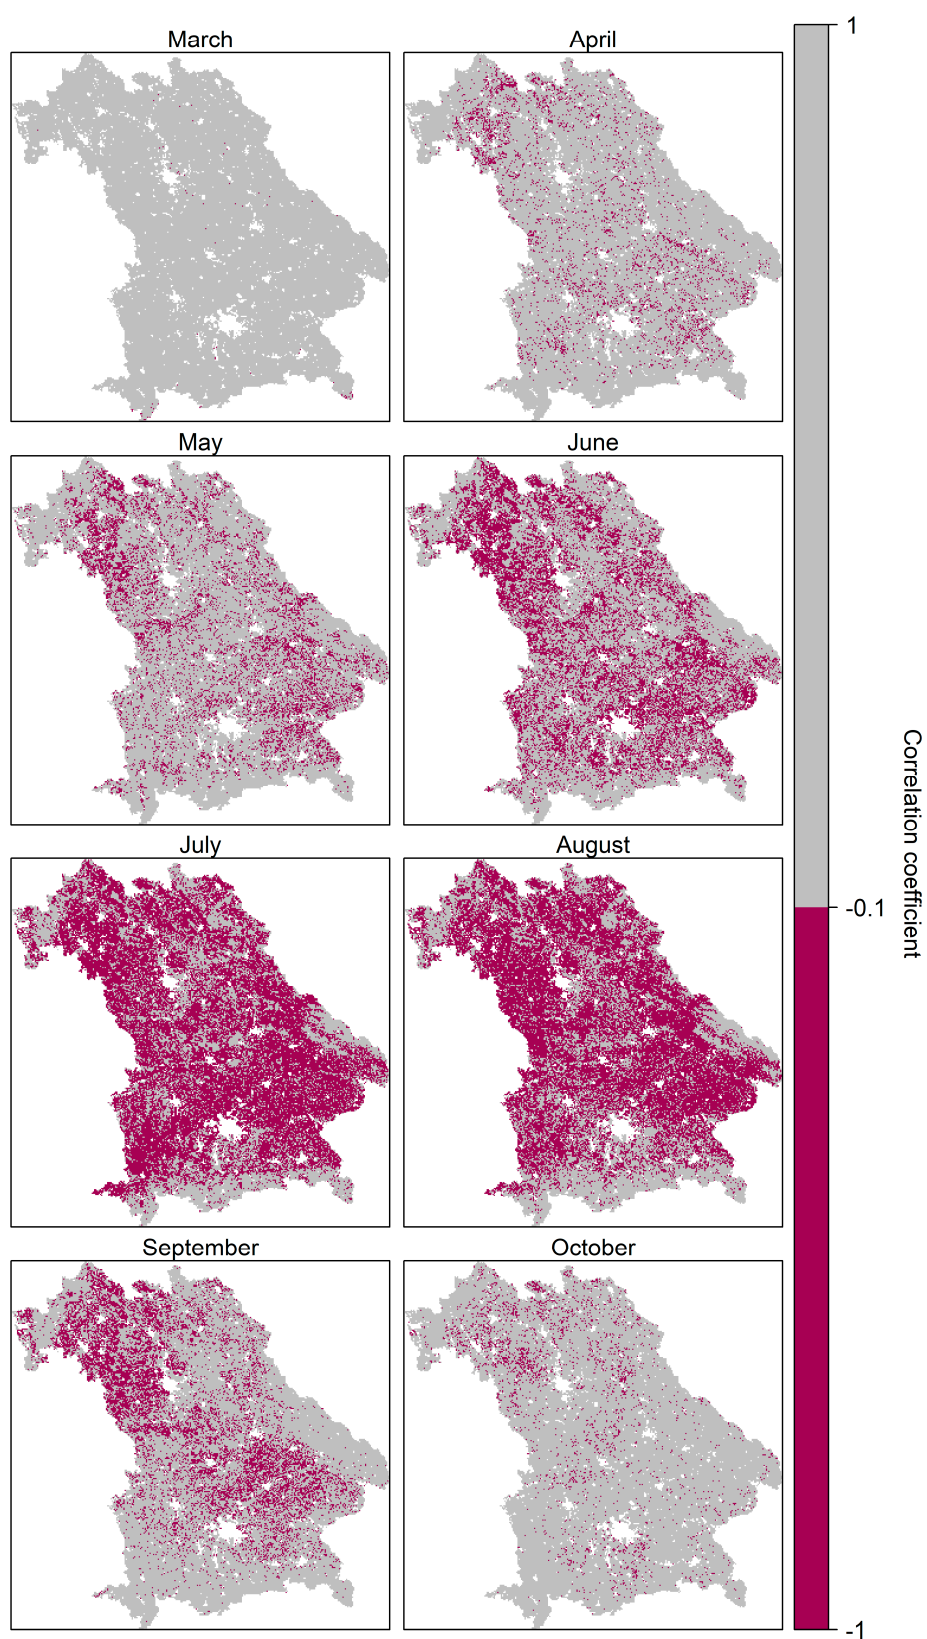

**Figure S6.** Pixel-based monthly correlation coefficients (Bravais-Pearson) between NDVI and LST in Bavaria from 2001 to 2020 during the vegetation period (March to October). The purple-colored pixels represent all areas in the respective month which are classified by a correlation coefficient  $\leq -0.1$ . These areas have thus been included in the application and validation of the calculated drought indices.



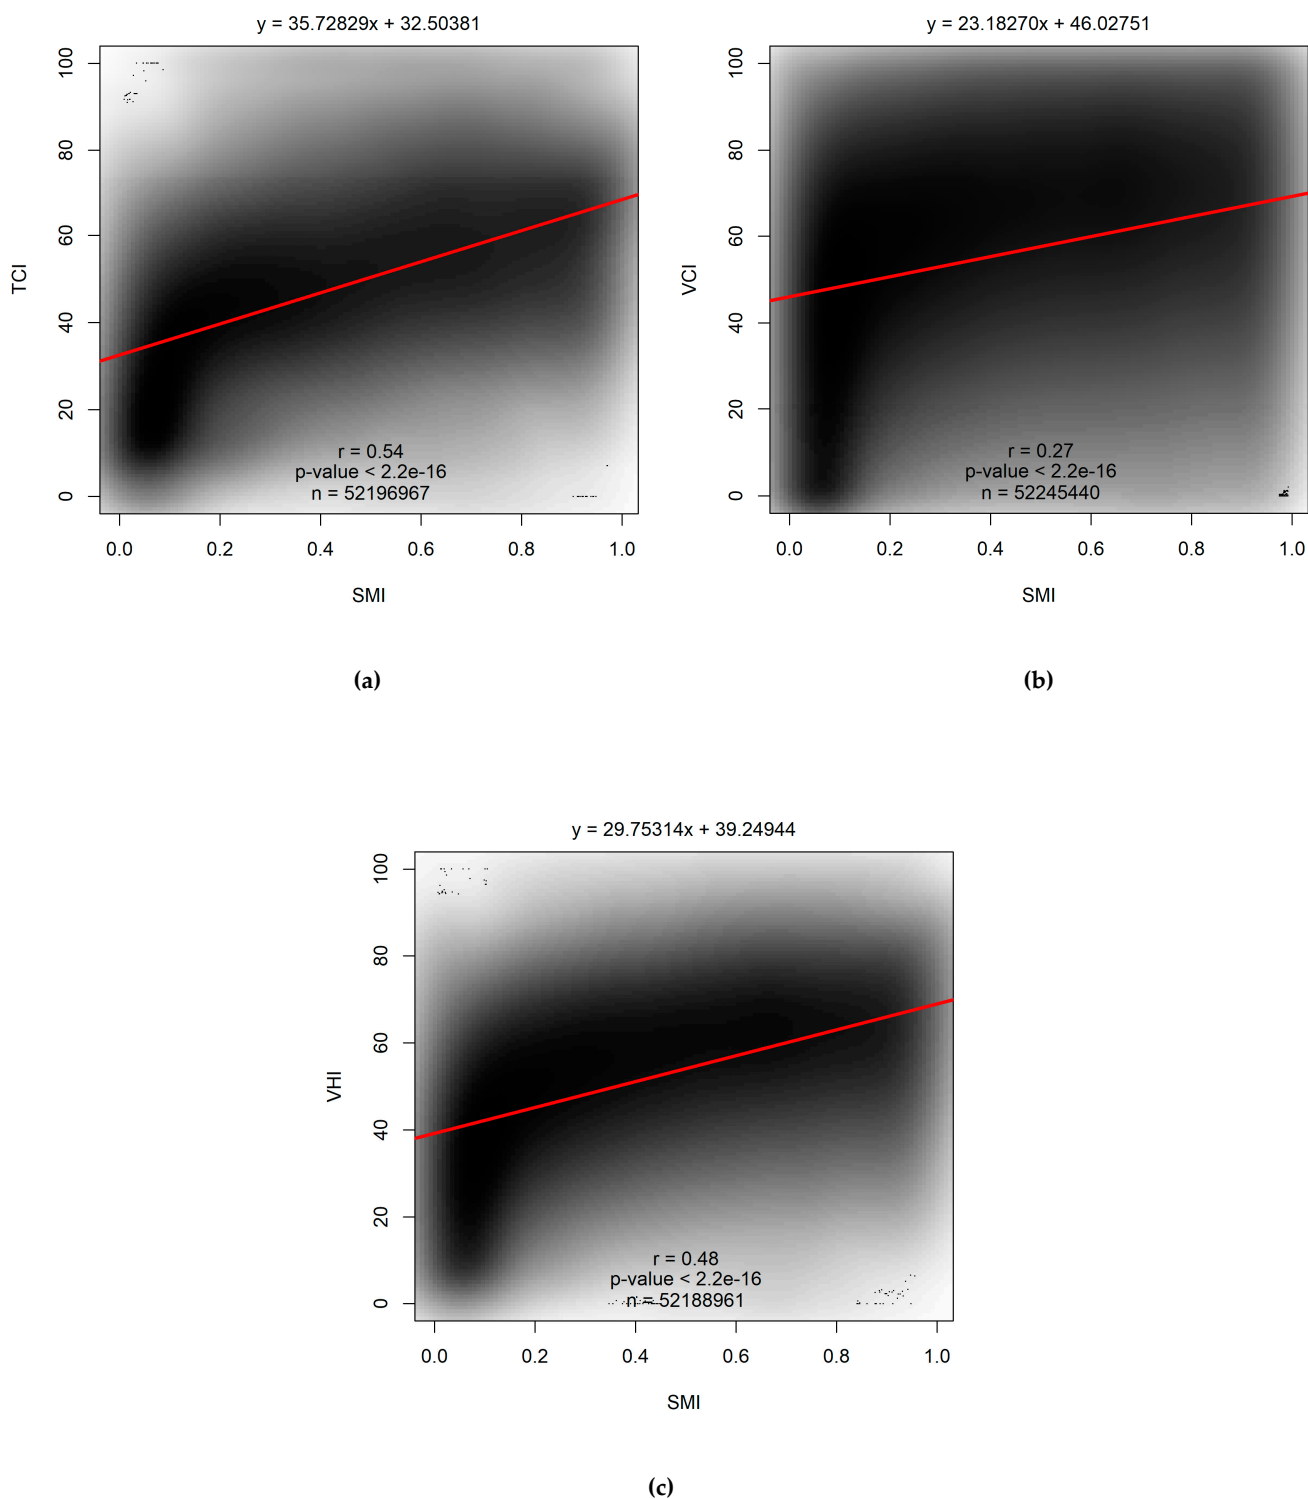

**Figure S7.** Pixel-based scatterplot between SMI and TCI (a), VCI (b) and VHI (c) in Bavaria from 2001 to 2020 (March to October). The red line represents the regression line associated to the regression equation (above the plot).  $r$  represents the correlation coefficient (according to Bravais-Pearson), the corresponding p-value and the number of value pairs are given.

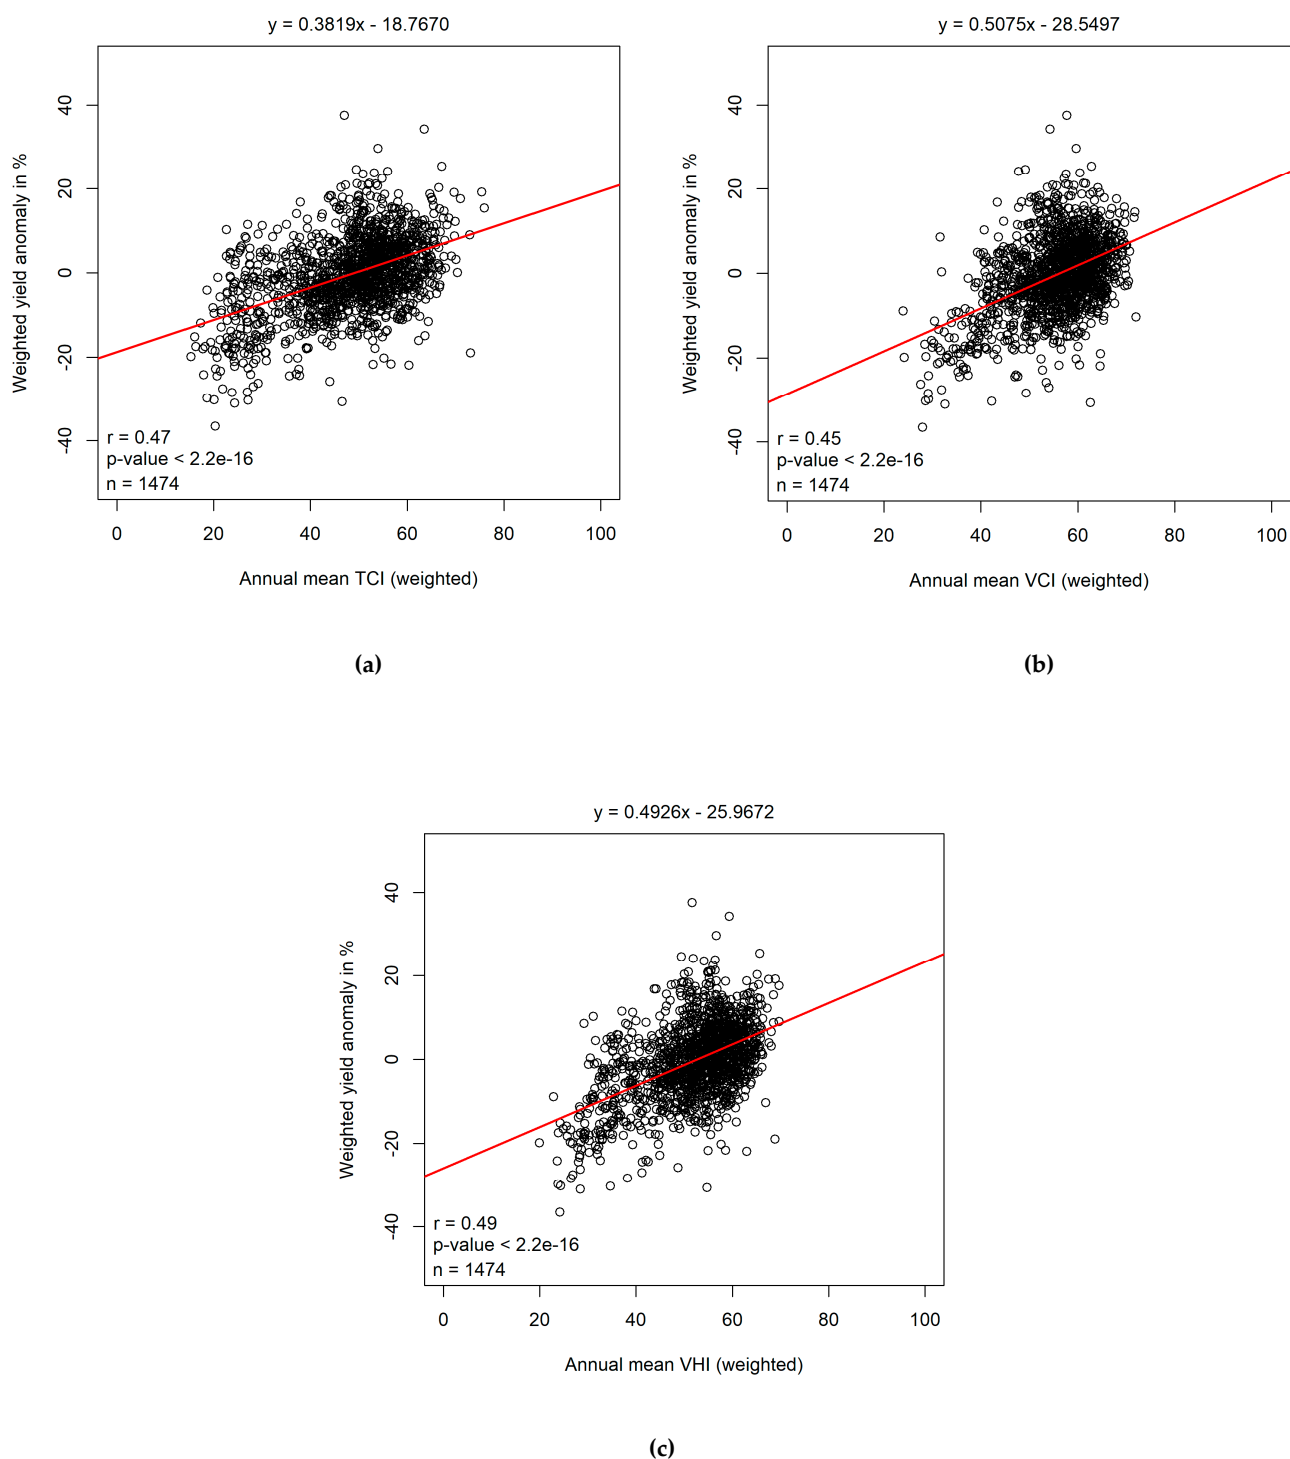

**Figure S8.** Scatterplot between weighted yield anomaly and weighted annual mean TCI (a), VCI (b) and VHI (c) in Bavaria from 2001 to 2019 (county level). The red line represents the regression line associated to the regression equation (above the plot).  $r$  represents the correlation coefficient (according to Bravais-Pearson), the corresponding p-value and the number of value pairs are given.

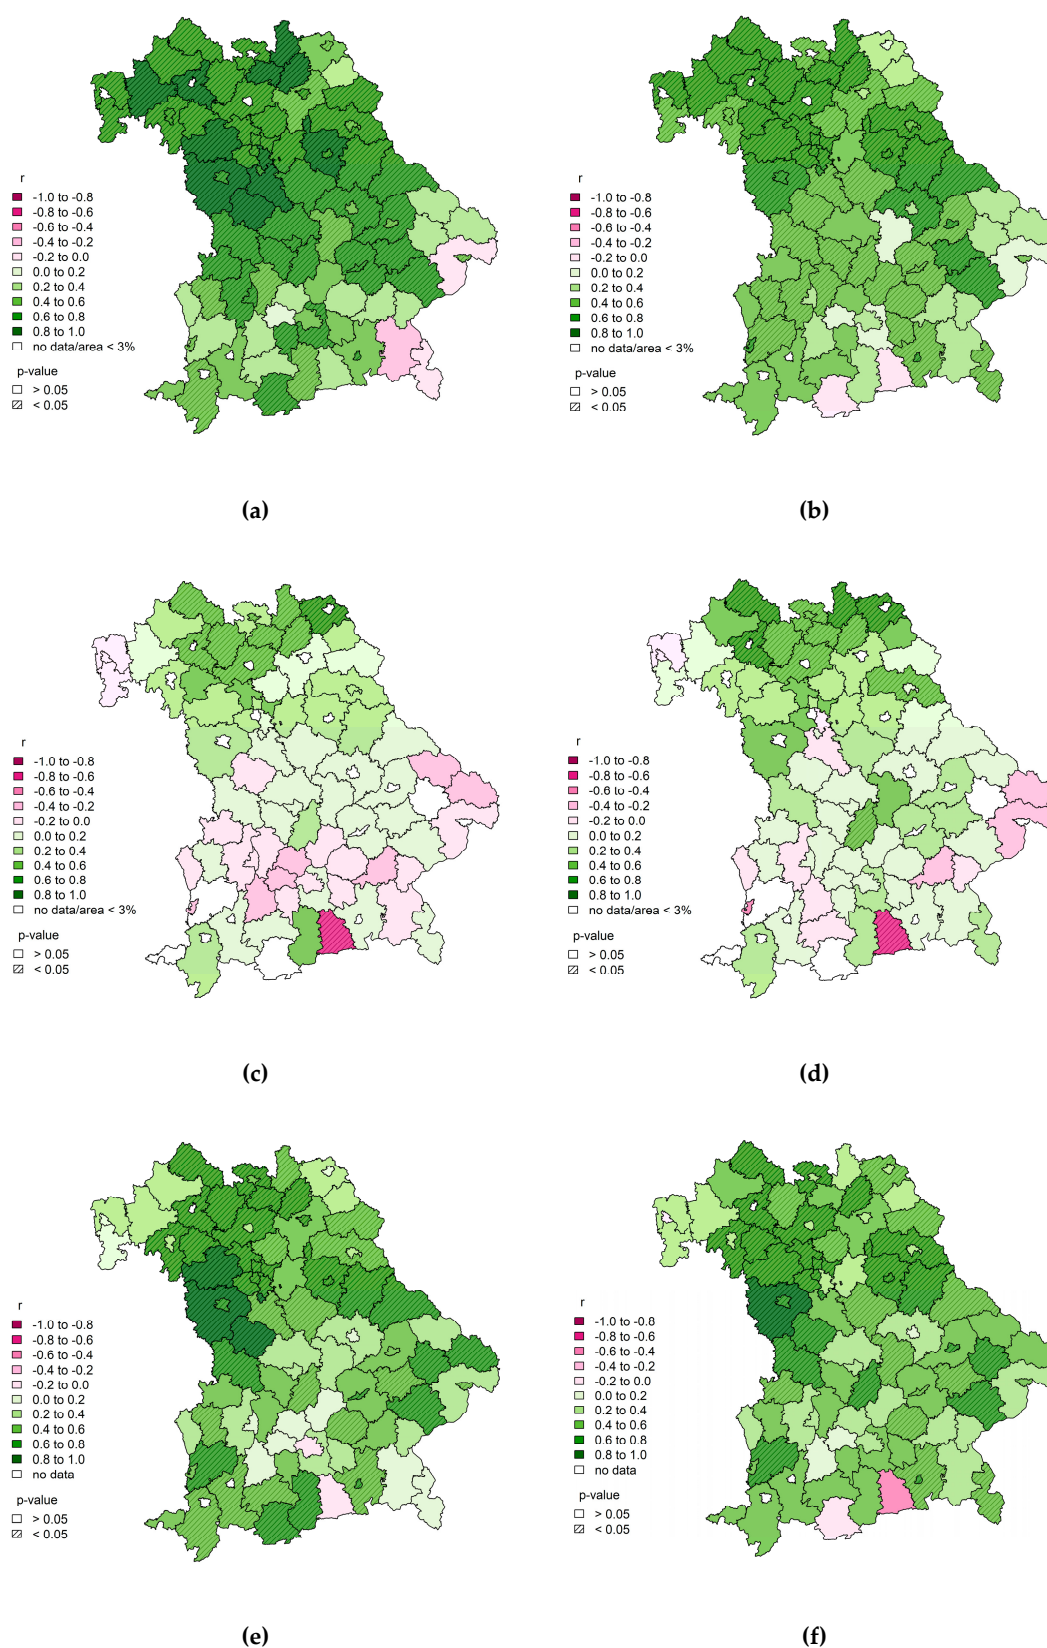

**Figure S9.** Bravais-Pearson correlation coefficients between the relative annual silage corn yield anomalies and the annual mean TCI (a) or VCI (b), the relative annual winter wheat yield anomalies and the annual mean TCI (c) or VCI (d), and the annual relatively weighted crop yield anomalies and the annual weighted TCI (e) or VCI (f) differentiated by county.

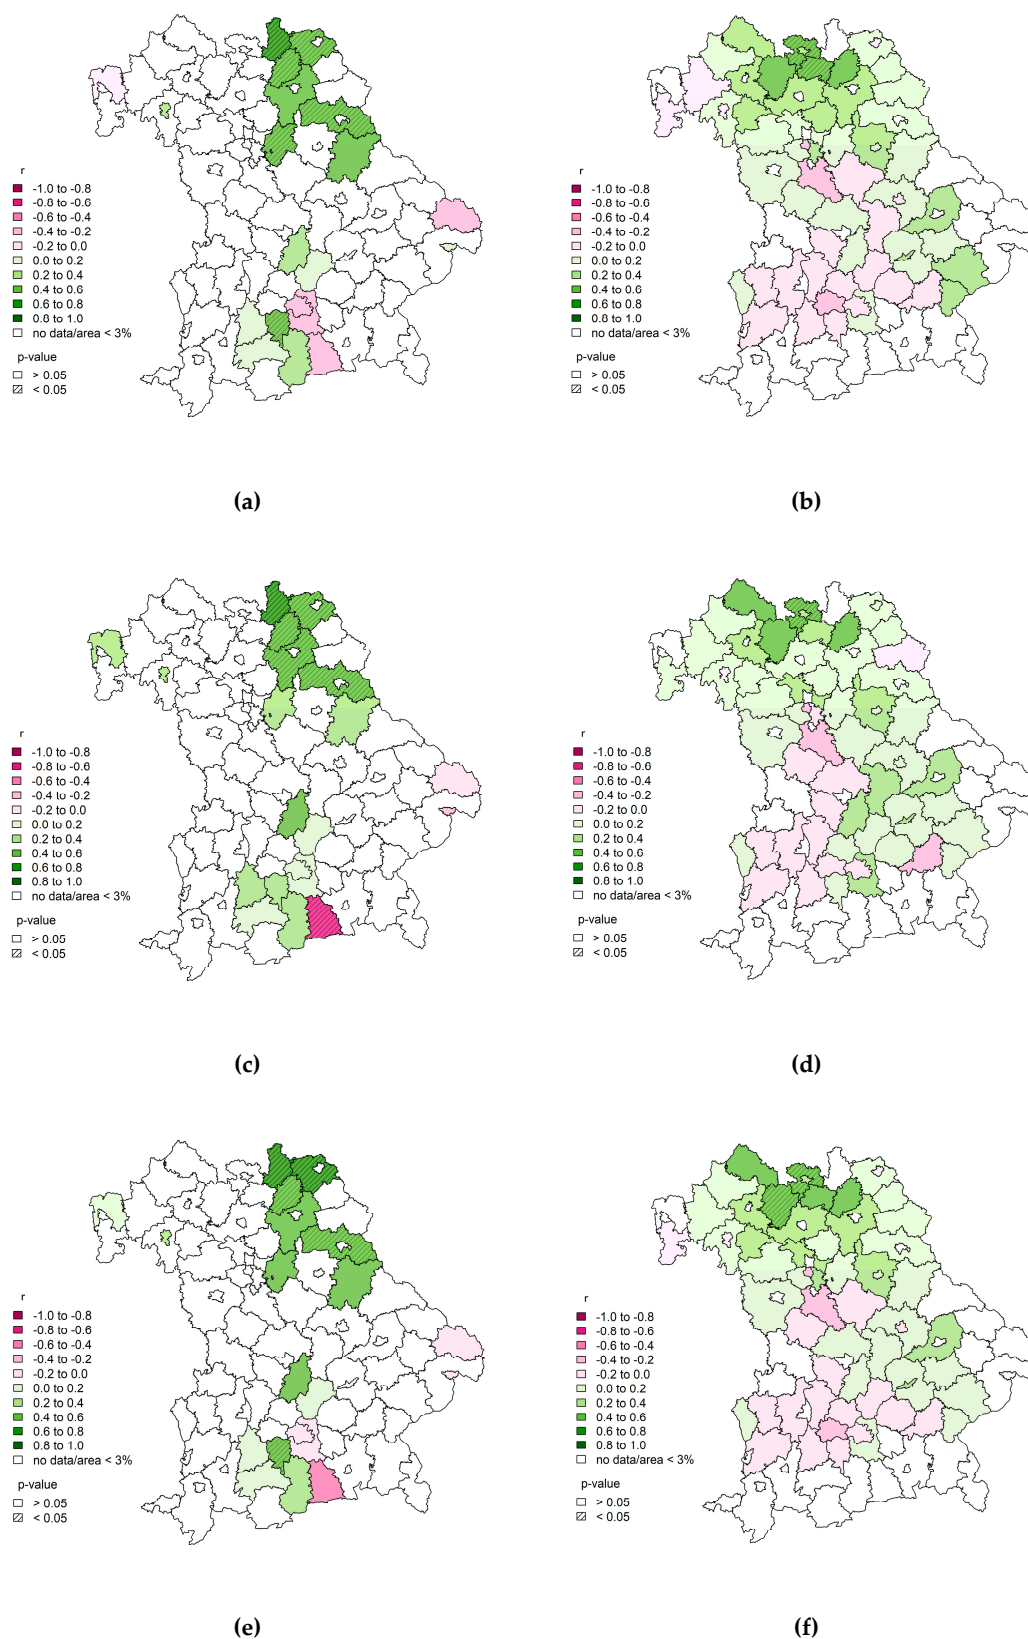

**Figure S10.** Bravais-Pearson correlation coefficients between the relative annual oat yield anomalies and the annual mean TCI (a)/VCI (c)/VHI (e) and the relative annual winter rapeseed yield anomalies and the annual mean TCI (b)/VCI (d)/VHI (f) differentiated by county.

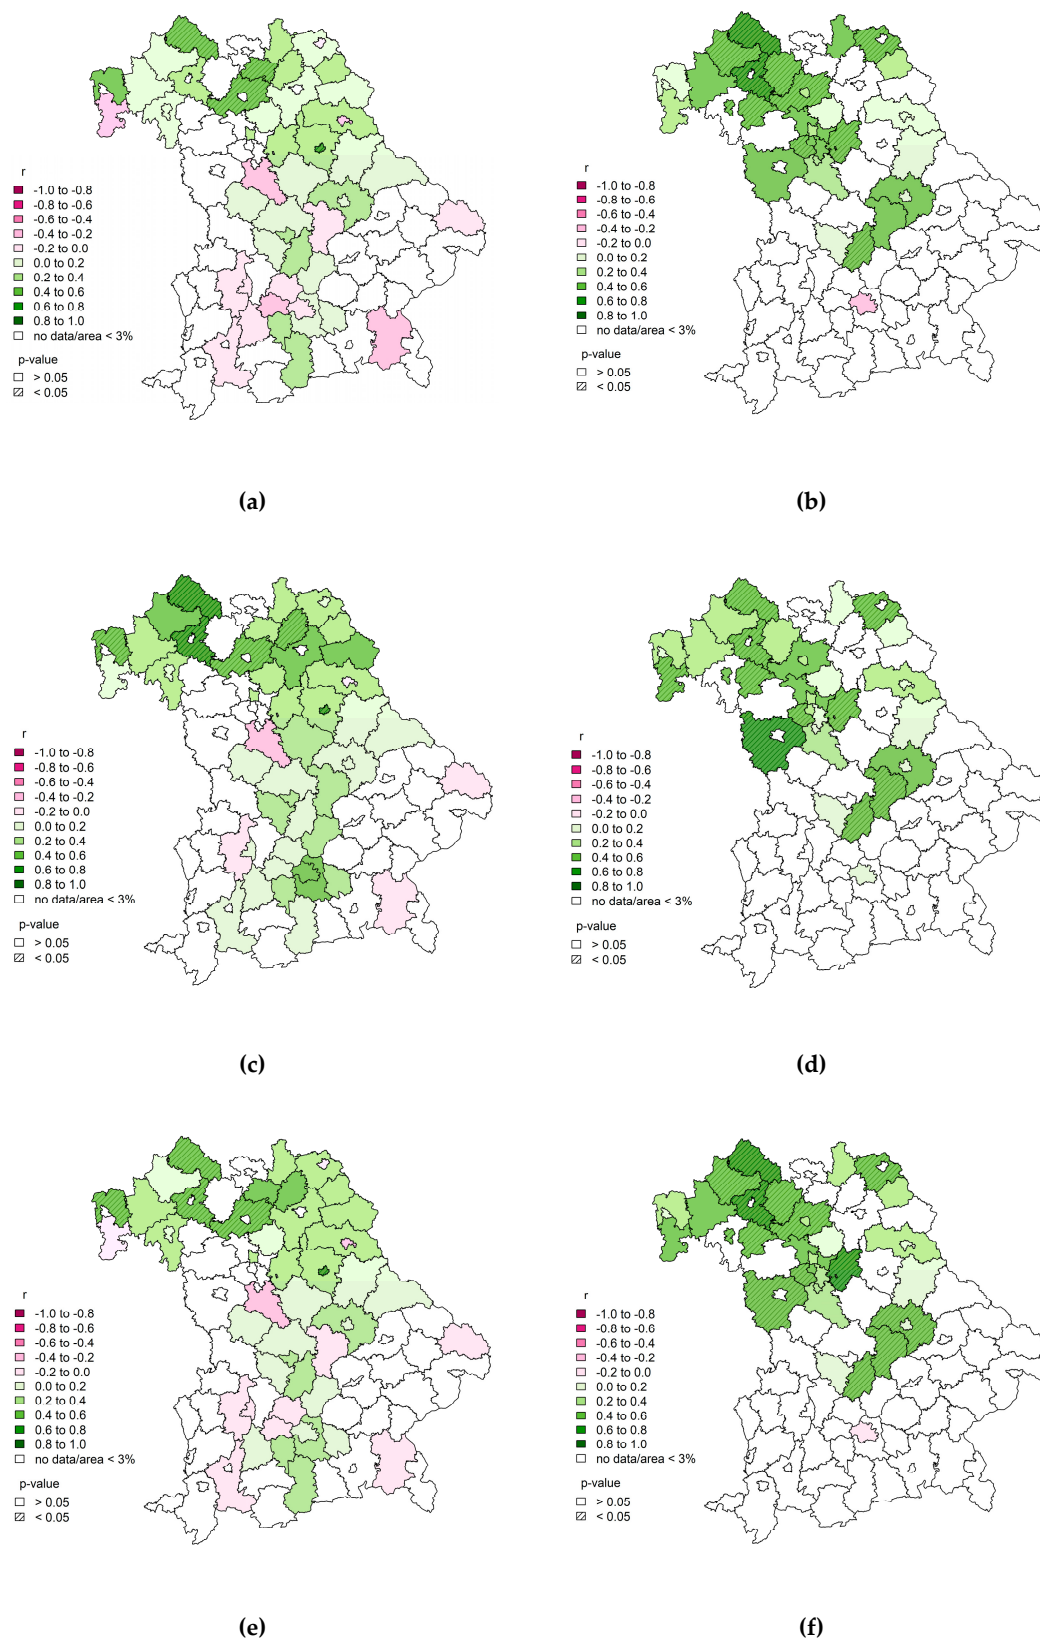

**Figure S11.** Bravais-Pearson correlation coefficients between the relative annual summer barley yield anomalies and the annual mean TCI (a)/VCI (c)/VHI (e) and the relative annual winter rye yield anomalies and the annual mean TCI (b)/VCI (d)/VHI (f) differentiated by county.



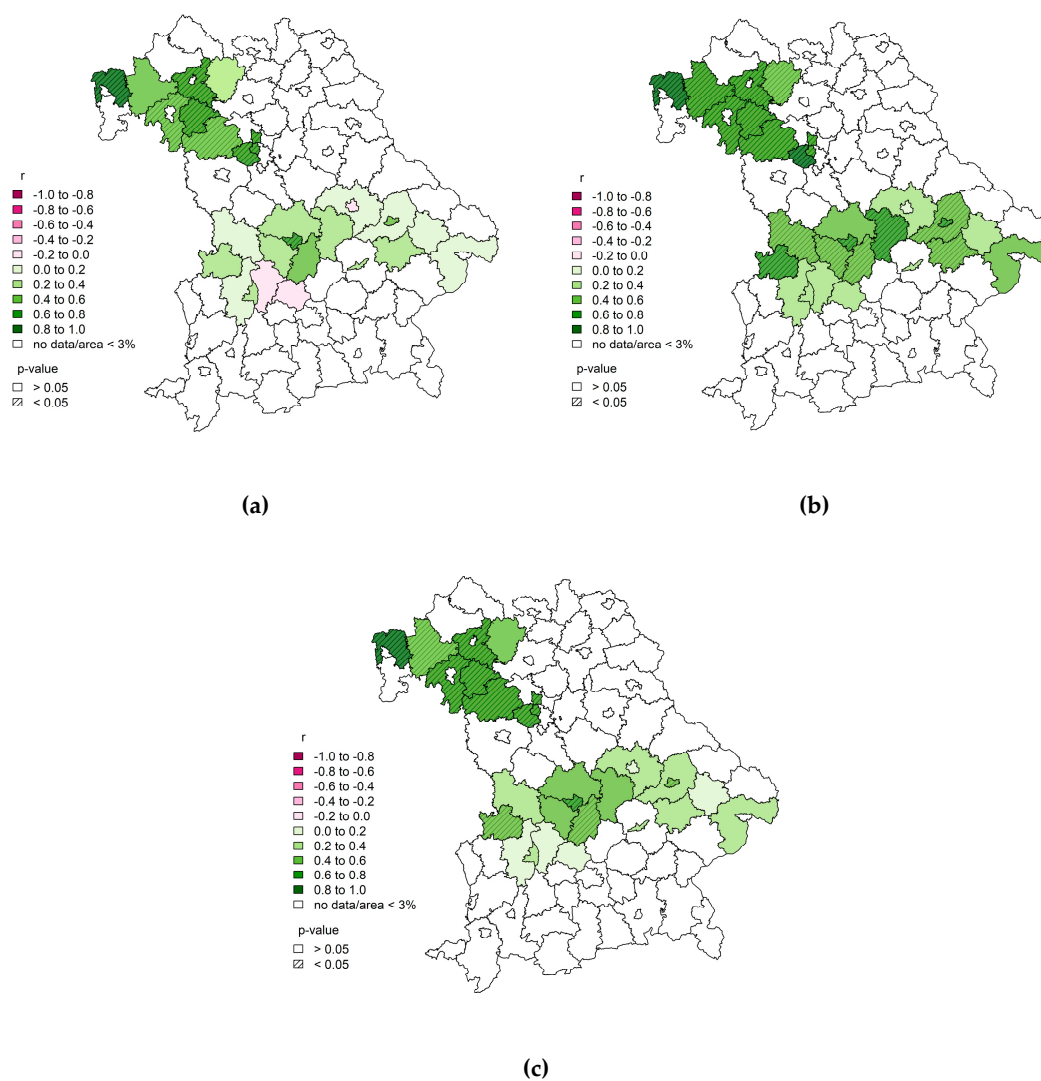

**Figure S12.** Bravais-Pearson correlation coefficients between the relative annual sugar beet yield anomalies and the annual mean TCI (a)/VCI (b)/VHI (c) differentiated by county.
